# Supplementary material
Source: publisher figshare collection journal article supplement (https://acs.figshare.com/ndownloader/files/10498984)
Supplement: Supplementary file 1 [file 10498984]

# Supporting Information for

## BFEE: A User-Friendly Graphical Interface Facilitating Absolute Binding Free-energy Calculations

*Haohao Fu,<sup>†</sup> James C. Gumbart,<sup>∇</sup> Haochuan Chen,<sup>†</sup> Xueguang Shao,<sup>†,‡,#</sup>*

*Wensheng Cai,<sup>\*,†,‡</sup> and Christophe Chipot,<sup>\*,<sup>⊥</sup>,§,§</sup>*

<sup>†</sup>Research Center for Analytical Sciences, College of Chemistry, Tianjin Key Laboratory of Biosensing and Molecular Recognition, Nankai University, Tianjin 300071, China

<sup>∇</sup>School of Physics and School of Chemistry and Biochemistry, Georgia Institute of Technology, Atlanta, Georgia 30332

<sup>‡</sup>Collaborative Innovation Center of Chemical Science and Engineering (Tianjin), Tianjin 300071, China

<sup>#</sup>State Key Laboratory of Medicinal Chemical Biology, Tianjin 300071, China

<sup>⊥</sup>Laboratoire International Associé Centre National de la Recherche Scientifique et University of Illinois at Urbana-Champaign, Unité Mixte de Recherche No. 7565, Université de Lorraine, B.P. 70239, 54506 Vandœuvre-lès-Nancy cedex, France

<sup>§</sup>Theoretical and Computational Biophysics Group, Beckman Institute, University of Illinois at Urbana-Champaign, Urbana, Illinois 61801

<sup>§</sup>Department of Physics, University of Illinois at Urbana-Champaign, 1110 West Green Street, Urbana, Illinois 61801, United States

Corresponding Author

\*E-mail: wscai@nankai.edu.cn (W.C.)

\*E-mail: chipot@ks.uiuc.edu (C.C.)

## Readme of example files

`bfee.tcl`: the source code of BFEE plug-in.

### Installation guide:

(Windows)

- 1) Create a "...\\VMD\\plugins\\noarch\\tcl\\bfee" directory
- 2) Extract the "bfee.tcl" file inside
- 3) Create in the "...\\bfee" a file named "pkgIndex.tcl" with the following line as content:  
`package ifneeded BFEEstimator 0.4 [list source [file join $dir bfee.tcl]]`
- 4) Run VMD, open Tk Console, type:  
`vmd_install_extension BFEEstimator bfee_tk "BFEE"`

(Linux and OSX)

- 1) Create a "\$HOME/vmdplugins" directory
- 2) Create in the "vmdplugins directory" a "bfee0.4" directory and extract the "bfee.tcl" file inside
- 3) Create in the "vmdplugins/bfee0.4" a file named "pkgIndex.tcl" with the following line as content:  
`package ifneeded BFEEstimator 0.4 [list source [file join $dir bfee.tcl]]`
- 4) Create a "\$HOME/.vmrc" file (or edit it if existing) containing the following 3 lines:  
`menu main on`  
`set auto_path [linsert $auto_path 0 [file join $env(HOME) vmdplugins]]`  
`vmd_install_extension BFEEstimator bfee_tk "My Plugins/BFEE"`
- 5) Run VMD, the plugin is accessible via the following Menu sequence:  
Extensions -> My Plugins -> BFEE

One can also see <http://www.ks.uiuc.edu/Research/vmd/plugins/doxygen/tcltkplugins.html> or <http://physiology.med.cornell.edu/faculty/hweinstein/vmdplugins/installation.html> for more information about the installation of a VMD plug-in.

`complex_structure/p41-abl/`: the `psf`, `coor`, `vel`, `xsc` and force field files for p41:Abl-SH3 system as an example. One can use them as inputs to set up a binding free energy calculation. In principle, the results of *J. Chem. Theory Comput.* **2013**, 9, 794-802 or *J. Chem. Theory Comput.* **2017**, 13, 5173-5178 can be reproduced.

`complex_structure/CD-guest/`: the `psf`, `coor`, `vel`, `xsc` and force field files for cyclodextrin (CD)-progesterone system as a toy model. Since achieving convergence for the

p41-abf example requires extensive computational simulations, we recommend using this case as a start point of applying BFEE. Note: in this example,  $r^* \leq 25 \text{ \AA}$  (by default,  $30 \text{ \AA}$ ) must be used in the post-treatment since the largest distance between CD and guest molecule in the separation simulation is  $25 \text{ \AA}$ .

`example_pmf/p41-abl/default`: the pmf files in a binding free energy calculation of p41:Abl-SH3. In this case, the default settings of BFEE were used, that is, using a single window for each process without changing any force constant. We got  $\Delta G = -6.9 \text{ kcal/mol}$  in this case (compare to  $-7.99 \text{ kcal/mol}$  in experiment), due to the inherent difficulties in the convergence of steps 1, 7 and 8. Using a window-stratified strategy for such complex cases, therefore, is highly recommended.

`example_pmf/p41-abl/window-stratified`: the pmf files generated in *J. Chem. Theory Comput.* **2017**, 13, 5173-5178. A calculated binding free energy of  $-8.0 \text{ kcal/mol}$  shows a good agreement with experiment, suggestive of the importance of using windowing strategy to accelerate convergence of free-energy calculations.

`example_pmf/CD-guest/`: the pmf files of CD-progesterone toy model. This example converges easily using the default settings of BFEE plug-in. The calculated binding free energy of progesterone to CD is  $-5.3 \text{ kcal/mol}$ , agreeing well with experimental value ( $-5.6 \text{ kcal/mol}$ ).

### **Difference between pmf, UI.pmf and czar.pmf files**

BFEE uses the extended adaptive biasing force (eABF) method to perform potential of mean force calculation. By default, NAMD will output `pmf` and `czar.pmf` files, which describes the results of naïve and czar estimator, respectively. The latter is usually much more rigorous than the former. The umbrella-integration based estimator (corresponding to `UI.pmf`), which can be enabled by

using “`UIestimator on`” in the Colvars config file, can be used as an alternative of czar estimator. See *J. Phys. Chem. B* **2017**, *121*, 3676–3685 for more information about the estimators. In practice, metadynamics and umbrella sampling can be also used in estimating free-energy change with respect to each coarse variable. One can see the latest version of Colvars reference manual for more information (<http://colvars.github.io/>).
